# Supplementary material for: Thermophysical properties of lithium thiogallate that are important for optical applications
Source: Royal Society of Chemistry journal article supplement (doi:10.1039/d1ra05698k), 2021-01-01
Supplement: d1ra05698k1.pdf [file d1ra05698k1.pdf]

## Supporting information

### Thermophysical Properties of Lithium Thiogallate that Are Important for Optical Applications

*Aleksey Kurus, Alexander Yelisseyev, Sergei Lobanov, Pavel Plyusnin, Maxim Molokeev, Leonid Solovyev, Dmitry Samoshkin, Sergei Stankus, Svetlana Melnikova and Lyudmila Isaenko*

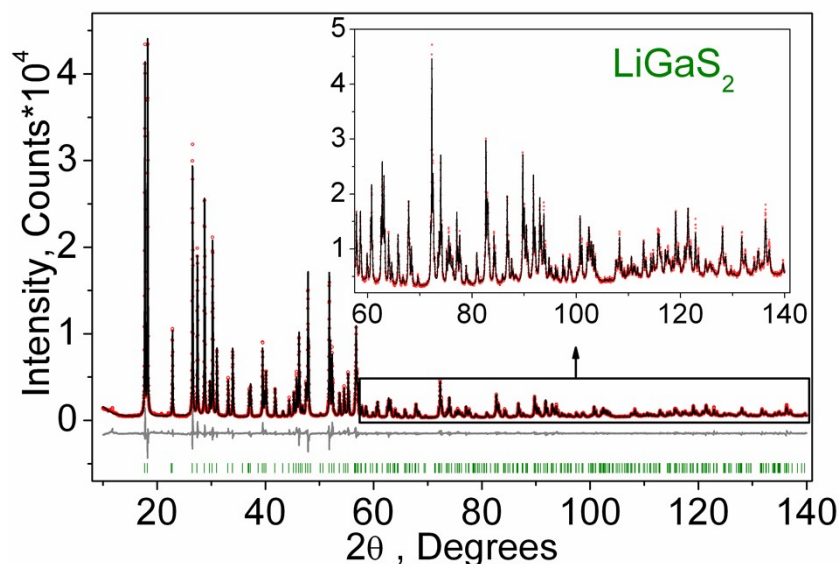

**Figure S1.** Difference Rietveld plot of  $\text{LiGaS}_2$ . (red dots – experimental data  $y_o$ , black line – calculated pattern  $y_c$ , grey line below – difference  $y_o - y_c$ , green sticks below – positions of Bragg peaks) of  $\text{LiGaSe}_2$ .

**Table S1.** Fractional atomic coordinates and isotropic displacement parameters ( $\text{\AA}^2$ ) of  $\text{LiGaS}_2$

|    | $x$        | $y$        | $z$         | $B_{\text{iso}}$ |
|----|------------|------------|-------------|------------------|
| Ga | 0.0732 (1) | 0.1262 (4) | 0           | 0.56 (6)         |
| Li | 0.083 (2)  | 0.629 (5)  | 0.025 (3)   | 0.6 (3)          |
| S1 | 0.0672 (3) | 0.1165 (5) | -0.3654 (3) | 0.86 (7)         |
| S2 | 0.4026 (3) | 0.1368 (5) | 0.1176 (3)  | 0.86 (7)         |

**Table S2.** Main bond lengths ( $\text{\AA}$ ) of  $\text{LiGaS}_2$

| Bond                | Bond length, ( $\text{\AA}$ ) | Bond                 | Bond length, ( $\text{\AA}$ ) |
|---------------------|-------------------------------|----------------------|-------------------------------|
| Ga—S1               | 2.275 (2)                     | Li—S1 <sup>iii</sup> | 2.33 (4)                      |
| Ga—S1 <sup>i</sup>  | 2.276 (4)                     | Li—S1 <sup>iv</sup>  | 2.38 (1)                      |
| Ga—S2               | 2.269 (2)                     | Li—S2 <sup>v</sup>   | 2.54 (2)                      |
| Ga—S2 <sup>ii</sup> | 2.290 (4)                     | Li—S2 <sup>ii</sup>  | 2.47 (3)                      |

Symmetry codes: (i)  $-x, -y, z+1/2$ ; (ii)  $x-1/2, -y+1/2, z$ ; (iii)  $-x, -y+1, z+1/2$ ; (iv)  $-x+1/2, y+1/2, z+1/2$ ; (v)  $-x+1/2, y+1/2, z-1/2$

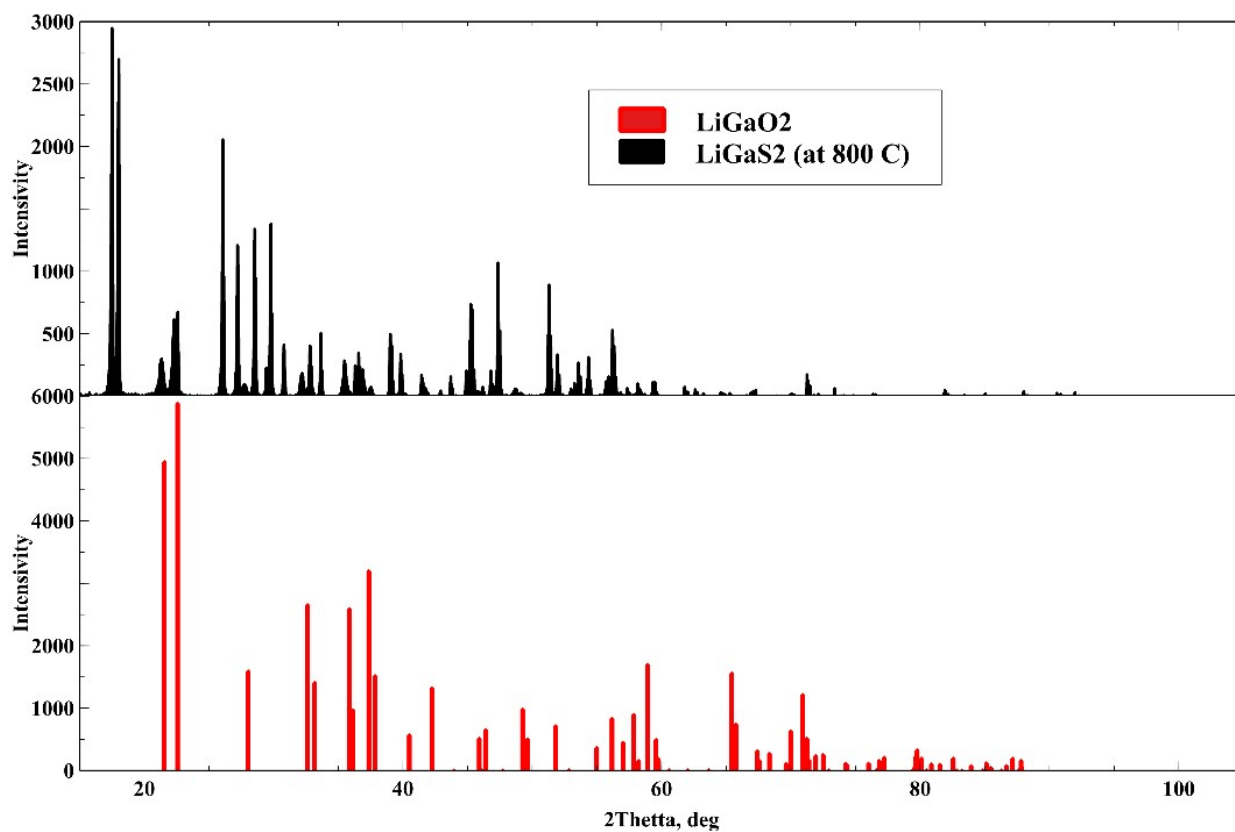

**Figure S2.** Comparison of the X-ray diffractograms for LiGaS<sub>2</sub> obtained at 1080 K (above) and LiGaO<sub>2</sub> (below, taken from [21]).
